# Supplementary material for: Design and preparation of a hybrid ferroelectric material through ethylene glycol covalently grafted to Kaolinite
Source: Royal Society of Chemistry journal article supplement (doi:10.1039/c7qi00341b), 2017-01-01
Supplement: c7qi00341b1.pdf [file c7qi00341b1.pdf]

## ESI

### **Design and preparation of hybrid ferroelectric material through ethyleneglycol covalently grafted to Kaolinite**

Qiao Qiao,<sup>a</sup> Yan-Ni Ding,<sup>a</sup> Shun-Ping Zhao,<sup>\*b</sup> Li Li,<sup>a</sup> Jian-Lan Liu,<sup>a</sup> Xiao-Ming Ren<sup>\*a,c,d</sup>

<sup>a</sup>State Key Laboratory of Materials-Oriented Chemical Engineering and College of Chemistry and Molecular Engineering, Nanjing Tech University, Nanjing 210009, P. R. China

<sup>b</sup>Anhui Provincial Laboratory of Optoelectronic and Magnetism Functional Materials and School of Chemistry and Chemical Engineering, Anqing Normal University, Anqing 246011, P. R. China

<sup>c</sup>College of Materials Science and Engineering, Nanjing Tech University, Nanjing 210009, P. R. China

<sup>d</sup>State Key Laboratory of Coordination Chemistry, Nanjing University 210093, P. R. China

Tel.: +86 25 58139476

Fax: +86 25 58139481

Email: [xmren@njtech.edu.cn](mailto:xmren@njtech.edu.cn)

## Contents

Figure S1 PXRD patterns of the samples of raw Kaolinite, K-DMSO and K-EG-cg, respectively, in the  $2\theta$  range of (a)  $5-50^\circ$  and (b)  $7-13^\circ$ .

Figure S2 PXRD patterns of raw Kaolinite, K-DMSO and K-EG-cg in the  $2\theta$  range of  $18-25^\circ$ .

Figure S3 Infrared spectra of the raw Kaolinite, K-DMSO and K-EG-cg in the range of (a)  $3800-2800$  (b)  $1800-400$   $\text{cm}^{-1}$ .

Figure S4 TG curves of the raw Kaolinite, K-DMSO and K-EG-cg.

Figure S5 DSC plot of K-EG-cg in the temperature range from 0 to  $285^\circ\text{C}$  (between 273 and 558 K).

Figure S6 Temperature dependent dielectric permittivity of K-EG-g in the temperature range of 123-473 K at selected frequencies.

Figure S7 Plots of  $\epsilon''$ -f and  $M''$ -f of (a, b) K-EG in the temperature range of 173- 353 K and (c, d) K-EG-cg in the temperature range of 123- 473 K.

Figure S8 Experimental and calculated PXRD patterns of K-EG-cg.

Figure S9 Packing structure viewed along a-axis direction for K-EG-cg.

Table S1: Characteristic IR bands and the assignments for K-EG-cg in four spectroscopic regions

Table S2: Unit cell parameters of K-EG-cg from geometry optimization together with raw Kaolinite obtained from single crystal structure\*

Table S3: Bond distances ( $\text{\AA}$ ) and bond angle ( $^\circ$ ) in EG\*\*

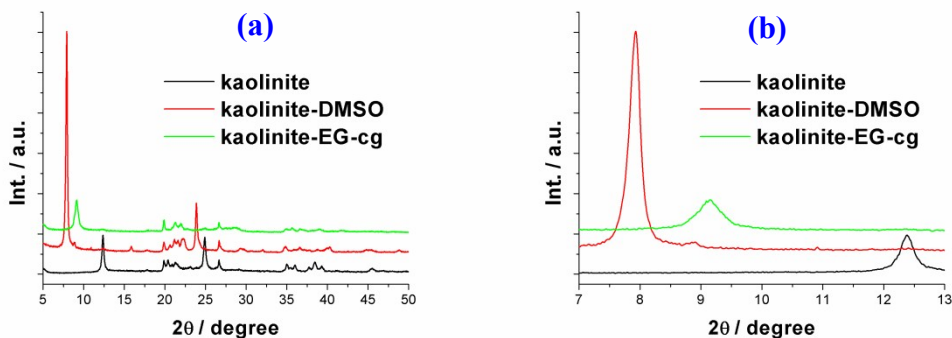

Figure S1 PXR D patterns of the samples of raw Kaolinite, K-DMSO and K-EG-cg, respectively, in the  $2\theta$  range of (a)  $5-50^\circ$  and (b)  $7-13^\circ$ .

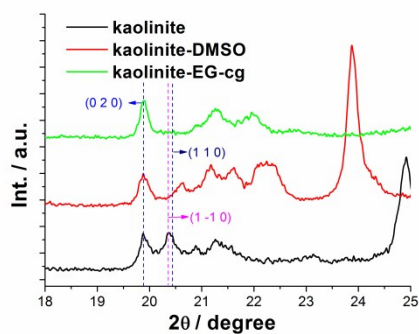

Figure S2 PXR D patterns of raw Kaolinite, K-DMSO and K-EG-cg in the  $2\theta$  range of  $18-25^\circ$ .

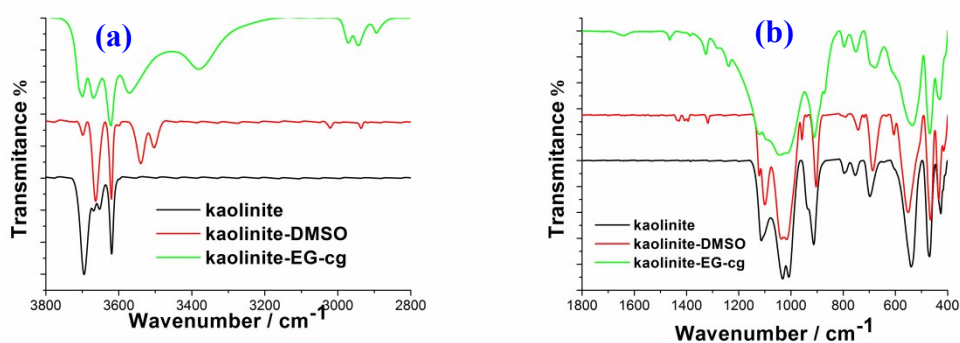

Figure S3 Infrared spectra of the raw Kaolinite, K-DMSO and K-EG-cg in the range of (a)  $3800-2800$  (b)  $1800-400$   $\text{cm}^{-1}$ .

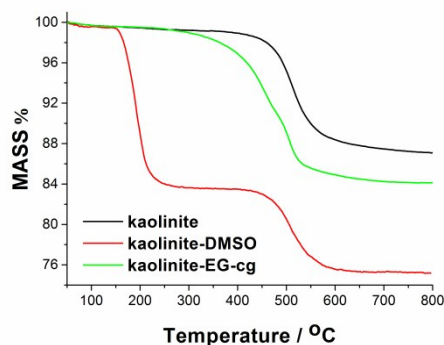

Figure S4 TG curves of the raw Kaolinite, K-DMSO and K-EG-cg.

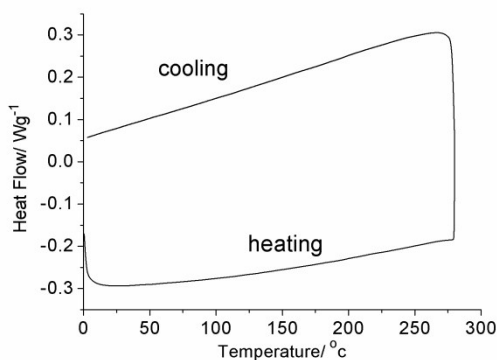

Figure S5 DSC plot of K-EG-cg in the temperature range from 0 to 285 °C (between 273 and 558 K).

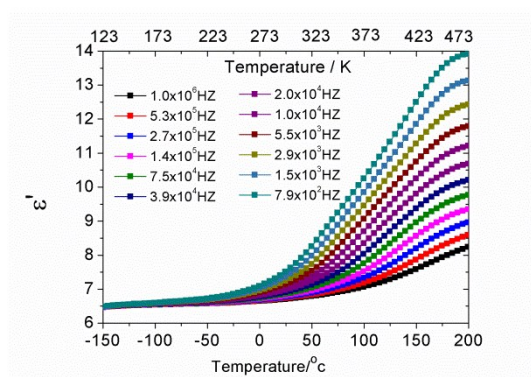

Figure S6 Temperature dependent dielectric permittivity of K-EG-g in the temperature range of 123-473 K at selected frequencies.

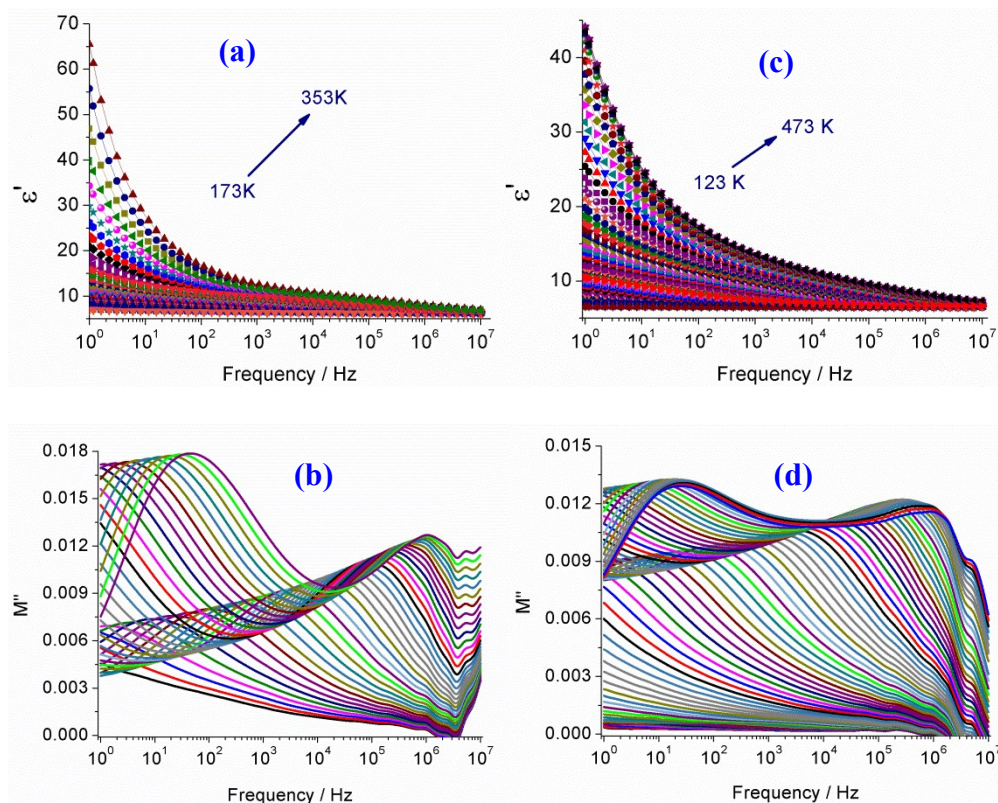

Figure S7 Plots of  $\epsilon''$ -f and  $M''$ -f of (a, b) K-EG in the temperature range of 173- 353 K and (c, d) K-EG-cg in the temperature range of 123- 473 K.

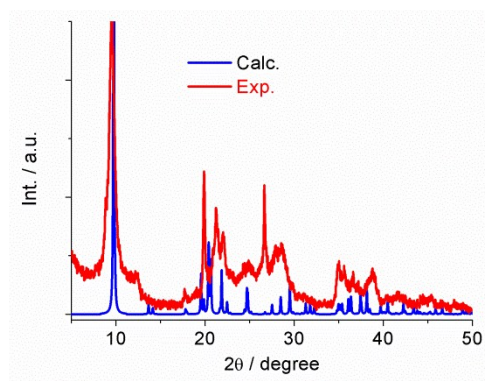

Figure S8 Experimental and calculated PXR D patterns of K-EG-cg.

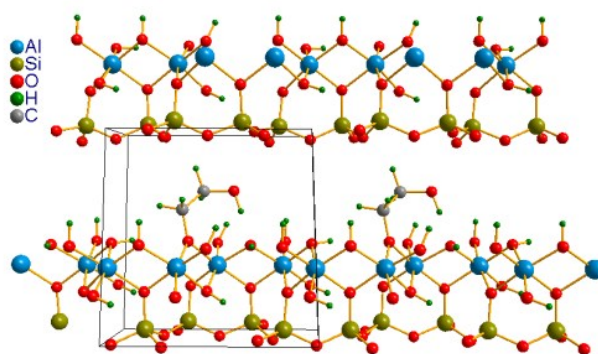

Figure S9 Packing structure viewed along a-axis direction for K-EG-cg.

Table S1: Characteristic IR bands and the assignments for K-EG-cg in four spectroscopic regions

|            | K-EG-cg          | Assignment                                 |
|------------|------------------|--------------------------------------------|
| Region I   | 3620             | $\nu(\text{OH})$ of inner OH group         |
|            | 3695,3667        | $\nu(\text{OH})$ of inner-surface OH group |
| Region II  | 3575,3391        | $\nu(\text{R-OH})$                         |
| Region III | 2970, 2945, 2895 | $\nu(\text{C-H})$                          |
|            | 1466             | $\nu(\text{C-C}), \delta(\text{CH}_2)$     |
| Region IV  | 1648, 1330       | OH bending vibrations                      |
|            | 1030-1070        | Al-O-C linkage                             |

Table S2: Unit cell parameters of K-EG-cg from geometry optimization together with raw Kaolinite obtained from single crystal structure\*

|                  | K-EG-cg | Raw kaolinite* |
|------------------|---------|----------------|
| a/Å              | 5.1535  | 5.1535         |
| b/Å              | 8.9419  | 8.9419         |
| c/Å              | 9.4038  | 7.3906         |
| $\alpha/^\circ$  | 91.926  | 91.926         |
| $\beta/^\circ$   | 105.046 | 105.046        |
| $\gamma/^\circ$  | 89.797  | 89.797         |
| V/Å <sup>3</sup> | 418.248 | 328.708        |

The c-axis length was fixed during the optimization

Table S3: Bond distances (Å) and bond angle ( $^\circ$ ) in EG\*\*

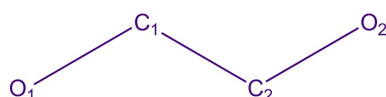

|                         | Single crystal | Optimization |
|-------------------------|----------------|--------------|
| O1-C1                   | 1.427          | 1.429        |
| C1-C2                   | 1.514          | 1.490        |
| C2-O2                   | 1.431          | 1.427        |
| $\angle\text{O1-C1-C2}$ | 112.0(3)       | 111.11       |
| $\angle\text{C1-C2-O2}$ | 109.5(9)       | 106.75       |

\* D. L. Bish, *Clays. Clay. Miner.*, 1993, **41**, 738.

\*\* R. Boese and H. C. Weiss, *Acta. Cryst.*, 1998, **C54**, IUC9800024.
